# Supplementary material for: Decorin inhibits the insulin-like growth factor I signaling in bone marrow mesenchymal stem cells of aged humans
Source: publisher site journal article supplement (doi:10.18632/aging.202166), 2020-11-26
Supplement: Supplementary file [file aging-v13i1-202166-supplementary-material-SD2.pdf]

## SUPPLEMENTARY TABLE

**Supplementary Table 1. Effect of aging on the methylation of 4 CpG islands in the DCN gene of human bmMSCs.**

| CGI-I                        |           |           |           |           |           |           |           |           |           |           |           |
|------------------------------|-----------|-----------|-----------|-----------|-----------|-----------|-----------|-----------|-----------|-----------|-----------|
| CpG site                     | 1         | 2         | 3         | 4         | 5         | 6         | 7         | 8         | 9         | 10        | 11        |
| Sample ID                    | Meth. (%) | Meth. (%) | Meth. (%) | Meth. (%) | Meth. (%) | Meth. (%) | Meth. (%) | Meth. (%) | Meth. (%) | Meth. (%) | Meth. (%) |
| Adult-1                      | 92.18     | 86.75     | 99.69     | 100       | 88.7      | 75.56     | 76.8      | 83.11     | 77.46     | 64.51     | 77.61     |
| Adult-1 + DMOG 10 $\mu$ M    | 95.51     | 97.91     | 97.93     | 100       | 100       | 81.81     | 92.15     | 100       | 96.38     | 86.19     | 99.24     |
| Adult-1 + DMOG 40 $\mu$ M    | 96.67     | 93.5      | 98        | 100       | 94.95     | 80.27     | 94.06     | 97.35     | 94.5      | 90.49     | 78.43     |
| Aged-1                       | 97.79     | 94.57     | 94.58     | 100       | 96.94     | 85.64     | 94.04     | 96.15     | 96.75     | 79.92     | 99.8      |
| Aged-1 + 5-aza-dC 10 $\mu$ M | 88.54     | 90.81     | 91.22     | 97.72     | 88.62     | 76.82     | 79.78     | 97.49     | 100       | 88.15     | 78.69     |

  

| CGI-II                       |           |           |           |           |           |
|------------------------------|-----------|-----------|-----------|-----------|-----------|
| CpG site                     | 1         | 2         | 3         | 4         | 5         |
| Sample ID                    | Meth. (%) | Meth. (%) | Meth. (%) | Meth. (%) | Meth. (%) |
| Adult-1                      | 92.67     | 100       | 99.82     | 88.36     | 83.37     |
| Adult-1 + DMOG 10 $\mu$ M    | 94.46     | 100       | 100       | 90.66     | 92.14     |
| Adult-1 + DMOG 40 $\mu$ M    | 93.97     | 100       | 98.74     | 89.04     | 92.26     |
| Aged-1                       | 92.96     | 100       | 100       | 91.01     | 86.11     |
| Aged-1 + 5-aza-dC 10 $\mu$ M | 85.24     | 100       | 90.83     | 84.77     | 77.12     |

  

| CGI-III                      |           |           |           |           |           |           |
|------------------------------|-----------|-----------|-----------|-----------|-----------|-----------|
| Sample ID                    | Meth. (%) | Meth. (%) | Meth. (%) | Meth. (%) | Meth. (%) | Meth. (%) |
| Adult-1                      | 95.42     | 100       | 100       | 95.01     | 100       | 84.98     |
| Adult-1 + DMOG 10 $\mu$ M    | 99.48     | 100       | 100       | 93.73     | 100       | 90.04     |
| Adult-1 + DMOG 40 $\mu$ M    | 98.05     | 97.57     | 100       | 95.55     | 100       | 91.34     |
| Aged-1                       | 97.23     | 100       | 100       | 91.81     | 100       | 91.64     |
| Aged-1 + 5-aza-dC 10 $\mu$ M | 86.54     | 88.23     | 100       | 85.72     | 92.98     | 82.41     |

  

| CGI-IV                       |           |           |           |           |           |           |           |           |           |           |           |           |
|------------------------------|-----------|-----------|-----------|-----------|-----------|-----------|-----------|-----------|-----------|-----------|-----------|-----------|
| CpG site                     | 1         | 2         | 3         | 4         | 5         | 6         | 7         | 8         | 9         | 10        | 11        | 12        |
| Sample ID                    | Meth. (%) | Meth. (%) | Meth. (%) | Meth. (%) | Meth. (%) | Meth. (%) | Meth. (%) | Meth. (%) | Meth. (%) | Meth. (%) | Meth. (%) | Meth. (%) |
| Adult-1                      | 77.45     | 91.01     | 72.69     | 49.94     | 93.01     | 92.4      | 87.31     | 96.3      | 78.09     | 97.48     | 84.37     | 86.65     |
| Adult-1 + DMOG 10 $\mu$ M    | 83.84     | 93.59     | 81.99     | 48.37     | 90.29     | 92.12     | 88.78     | 96.48     | 77.39     | 97.97     | 82.73     | 88.62     |
| Adult-1 + DMOG 40 $\mu$ M    | 82.1      | 92.49     | 80.65     | 49.75     | 93.08     | 92.47     | 86.77     | 97.38     | 73.38     | 98.16     | 82.98     | 88.52     |
| Aged-1                       | 83.81     | 92.26     | 80.32     | 33.34     | 92.12     | 89.66     | 88.63     | 97.75     | 75.75     | 96.31     | 83.57     | 88.1      |
| Aged-1 + 5-aza-dC 10 $\mu$ M | 78.12     | 84.09     | 74.98     | 31.96     | 79.56     | 82.81     | 78.58     | 87        | 69.76     | 88.92     | 74.6      | 78.23     |
